# Supplementary material
Source: publisher figshare collection journal article supplement (https://asha.figshare.com/articles/dataset/_/17131856)
Supplement: Supplementary file 2 [file 1]

**Supplemental Material S2.** Results of the voluntary participant experience survey. Ten of 21 participants chose to complete the survey. Similar participant comment statements were grouped so that results could be summarized.

| Questions                                                                             | Responses |           |         |      |           |
|---------------------------------------------------------------------------------------|-----------|-----------|---------|------|-----------|
| Please rate the following:                                                            | Very Good | Good      | OK      | Poor | Very Poor |
| Quality of connection during the video chat                                           | 9         | 1         | 0       | 0    | 0         |
| Comfort level sharing personal information via video chat                             | 10        | 0         | 0       | 0    | 0         |
| Setting up technology for the research tasks                                          | 9         | 1         | 0       | 0    | 0         |
| Software training procedure                                                           | 8         | 2         | 0       | 0    | 0         |
|                                                                                       | More      | Less      | Neither |      |           |
| Participating in remote research was more or less difficult                           | 2         | 3         | 5       |      |           |
|                                                                                       | Yes       | No        |         |      |           |
| Have you participated in research studies at BTNRH in-person in the past?             | 9         | 1         |         |      |           |
|                                                                                       | Remote    | In-person | Either  |      |           |
| If you participate in future research studies at Boys Town, would you prefer they be: | 1         | 0         | 9       |      |           |
| Comments:                                                                             |           |           |         |      |           |
| Insecure about equipment set up                                                       | 5         |           |         |      |           |
| Staff was very helpful/friendly                                                       | 2         |           |         |      |           |
| Liked not having to leave my house                                                    | 2         |           |         |      |           |
| Study Binder was helpful                                                              | 2         |           |         |      |           |
| Equipment delivery appointments less convenient                                       | 1         |           |         |      |           |
| Liked doing it on my own time                                                         | 1         |           |         |      |           |
| Video instruction by staff helpful                                                    | 1         |           |         |      |           |
| Concern about background noise                                                        | 1         |           |         |      |           |
| Text messaging helpful                                                                | 1         |           |         |      |           |
| Video interaction was awkward                                                         | 1         |           |         |      |           |
| Well organized and clean                                                              | 1         |           |         |      |           |
